# Supplementary material for: Unraveling the Secrets of a Double-Life Fungus by Genomics: Ophiocordyceps australis CCMB661 Displays Molecular Machinery for Both Parasitic and Endophytic Lifestyles
Source: MDPI journal article supplement (doi:10.3390/jof9010110), 2023-01-13
Supplement: s1 [file s1]

Supplementary material

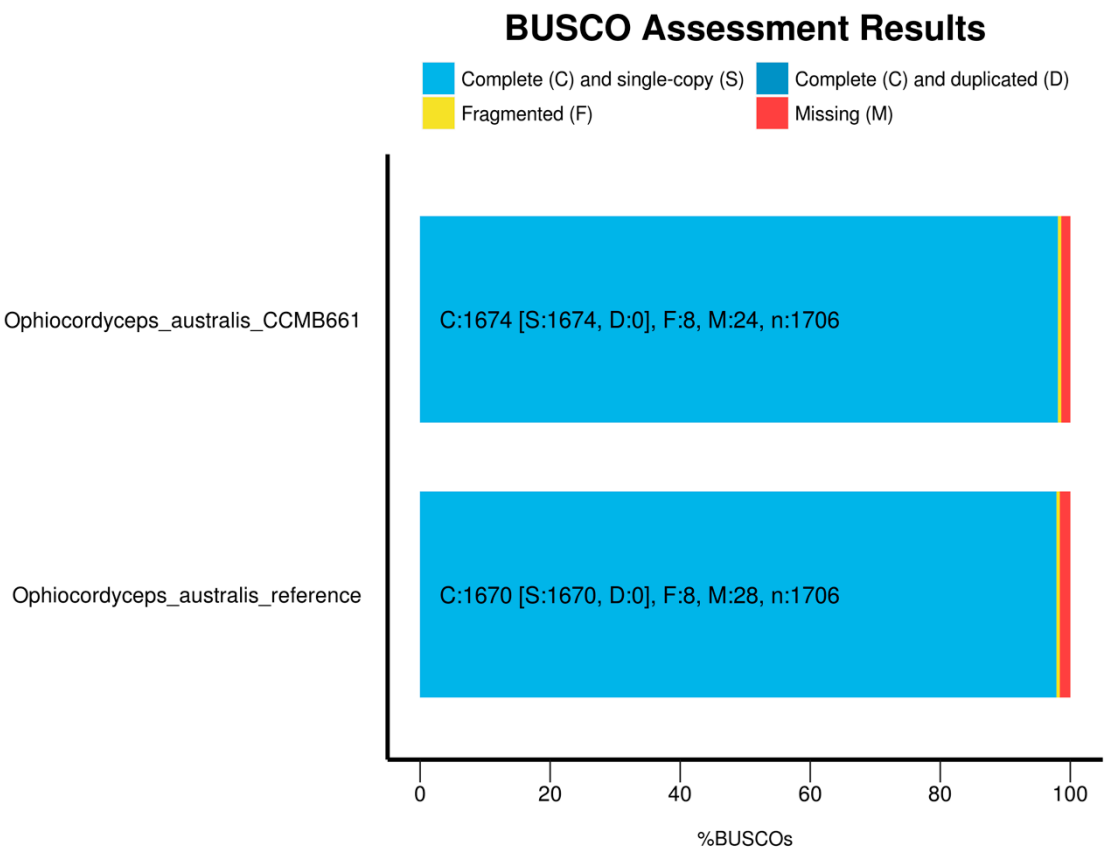

**Figure S1:** BUSCO quality assessment results for the genome of *Ophiocordyceps australis* CCMB661 and Map64.

**Table S1:** Sequences of *Ophiocordyceps* species from NCBI-GenBank databases used in phylogenetic analyses and their associated metadata.

| Species                               | ID Isolate  | GenBank Accession Number |          |          | Host order          | Reference                        |
|---------------------------------------|-------------|--------------------------|----------|----------|---------------------|----------------------------------|
|                                       |             | LSU                      | ITS      | TEF      |                     |                                  |
| <i>Metacordyceps taii</i>             | ARSEF 5714  | AF543787                 | -        | AF543775 | Lepidoptera         | [120]                            |
| <i>Metacordyceps taii</i>             | ARSEF 5714  | -                        | JN049829 | -        | Lepidoptera         | [53]                             |
| <i>Ophiocordyceps arborescens</i>     | NBRC 105891 | AB968414                 | AB968398 | AB968572 | Lepidoptera         | [121]                            |
| <i>Ophiocordyceps arborescens</i>     | NBRC 105890 | AB968415                 | AB968399 | AB968573 | Lepidoptera         | [121]                            |
| <i>Ophiocordyceps australis</i>       | Ophaus 1780 | KC610762                 | KP200888 | KC610732 | Hymenoptera         | [17]                             |
| <i>Ophiocordyceps australis</i>       | Ophaus 774  | KC610764                 | n/a      | KC610734 | Hymenoptera         | [17]                             |
| <i>Ophiocordyceps australis</i>       | Ophaus 926  | KC610765                 | n/a      | KC610735 | Hymenoptera         | [17]                             |
| <i>Ophiocordyceps australis</i>       | HUATSF 774a | MF416562                 | n/a      | MF416510 | Hymenoptera         | [122]                            |
| <i>Ophiocordyceps coccidiicola</i>    | NBRC 100682 | AB968419                 | AB968404 | AB968583 | Hemiptera           | [121]                            |
| <i>Ophiocordyceps coenomyia</i>       | NBRC 108993 | AB968412                 | AB968396 | AB968570 | Diptera             | [121]                            |
| <i>Ophiocordyceps coenomyia</i>       | NBRC 106964 | AB968413                 | AB968397 | AB968571 | Diptera             | [121]                            |
| <i>Ophiocordyceps evansii</i>         | Ophsp 858   | KC610770                 | KP200889 | KC610736 | Hymenoptera         | [17]                             |
| <i>Ophiocordyceps evansii</i>         | Ophsp 912   | KC610771                 | KP200890 | KC610737 | Hymenoptera         | [17]                             |
| <i>Ophiocordyceps gracilis</i>        | EFCC 8572   | EF468811                 | -        | EF468751 | Lepidoptera         | [18]                             |
| <i>Ophiocordyceps gracilis</i>        | EFCC 8572   | -                        | JN049851 | -        | Lepidoptera         | [53]                             |
| <i>Ophiocordyceps heteropoda</i>      | EFCC 10125  | EF468812                 | -        | EF468752 | Hemiptera           | [18]                             |
| <i>Ophiocordyceps heteropoda</i>      | EFCC 10125  | -                        | JN049852 | -        | Hemiptera           | [53]                             |
| <i>Ophiocordyceps irangiensis</i>     | OSC 128577  | DQ518760                 | JN049823 | DQ522329 | Hymenoptera         | [123]                            |
| <i>Ophiocordyceps irangiensis</i>     | OSC 128578  | DQ518770                 | JN049833 | DQ522345 | Hymenoptera         | [123]                            |
| <i>Ophiocordyceps longissima</i>      | NBRC 106965 | AB968420                 | AB968406 | AB968584 | Hemiptera           | [121]                            |
| <i>Ophiocordyceps macroacicularis</i> | NBRC 100685 | AB968416                 | AB968400 | AB968574 | Lepidoptera         | [121]                            |
| <i>Ophiocordyceps macroacicularis</i> | NBRC 105888 | AB968417                 | AB968401 | AB968575 | Lepidoptera         | [121]                            |
| <i>Ophiocordyceps myrmecophila</i>    | BCC 82796   | MH028153                 | MH028150 | MH028187 | Hymenoptera         | [124]                            |
| <i>Ophiocordyceps myrmecophila</i>    | BCC 82985   | MH028155                 | MH028149 | MH028189 | Hymenoptera         | [124]                            |
| <i>Ophiocordyceps myrmecophila</i>    | BCC 82258   | MH028159                 | MH028147 | MH028190 | Hymenoptera         | [124]                            |
| <i>Ophiocordyceps myrmecophila</i>    | BCC 82984   | MH028162                 | MH028148 | MH028192 | Hymenoptera         | [124]                            |
| <i>Ophiocordyceps nutans</i>          | NBRC 101749 | JN941429                 | -        | -        | Hemiptera           | Okane, I., 2011<br>(Unpublished) |
| <i>Ophiocordyceps nutans</i>          | NBRC 101749 | -                        | AB968408 | AB968589 | Hemiptera           | [121]                            |
| <i>Ophiocordyceps rhizoidea</i>       | NHJ 12522   | EF468825                 | JN049857 | EF468764 | Blattodea (Termite) | [18]                             |
| <i>Ophiocordyceps sinensis</i>        | EFCC 7287   | EF468827                 | -        | EF468767 | Lepidoptera (pupae) | [18]                             |
| <i>Ophiocordyceps sinensis</i>        | EFCC 7287   | -                        | JN049854 | -        | Lepidoptera (pupae) | [53]                             |
| <i>Ophiocordyceps sobolifera</i>      | NBRC 106967 | AB968422                 | AB968409 | AB968590 | Hemiptera           | [121]                            |

|                                      |             |          |          |          |                     |       |
|--------------------------------------|-------------|----------|----------|----------|---------------------|-------|
| <i>Ophiocordyceps stylophora</i>     | OSC 111000  | DQ518766 | -        | DQ522337 | Coleoptera          | [123] |
| <i>Ophiocordyceps stylophora</i>     | OSC 111000  | -        | JN049828 | -        | Coleoptera          | [53]  |
| <i>Ophiocordyceps stylophora</i>     | NBRC 100947 | JN941447 | JN943352 | -        | Coleoptera (larvae) | [125] |
| <i>Ophiocordyceps stylophora</i>     | NBRC 100947 | -        | -        | AB968579 | Coleoptera (larvae) | [121] |
| <i>Ophiocordyceps thanathonensis</i> | MFLU 162908 | MF362990 | MF362991 | MF372760 | Hymenoptera         | [126] |
| <i>Ophiocordyceps thanathonensis</i> | MFLU 162909 | MF850378 | MF850376 | MF872613 | Hymenoptera         | [126] |
| <i>Ophiocordyceps thanathonensis</i> | MFLU 162910 | MF850377 | MF850375 | MF872614 | Hymenoptera         | [126] |
| <i>Ophiocordyceps tricentri</i>      | NBRC 106968 | AB968423 | AB968410 | AB968593 | Hemiptera           | [121] |

### References Supplementary material (Table S1)\*

120. Currie, C. R., Wong, B., Stuart, A. E., Schultz, T. R., Rehner, S. A., Mueller, U. G., Soung, G. H., Spatafora, J. W. & Straus, N. A. Ancient tripartite coevolution in the attine ant-microbe symbiosis. *Science*. 2003, 299, 5605, 386-388.
121. Ban, S., Sakane, T., & Nakagiri, A. Three new species of *Ophiocordyceps* and overview of anamorph types in the genus and the family Ophiocordyceptaceae. *Mycological progress*. 2015, 14, 1, 1017.
122. Kepler, R. M., Luangsa-Ard, J. J., Hywel-Jones, N. L., Quandt, C. A., Sung, G. H., Rehner, S. A., Aime, M. C., Henkel, T. W., Sanjuan, T., Zare, R., Chen, M., Li, Z., Rossman, A. Y., Spatafora, J. W. & Shrestha, B. A phylogenetically-based nomenclature for Cordycipitaceae (Hypocreales). *IMA fungus*. 2017. 8, 2, 335-353.
123. Spatafora, J. W., Sung, G. H., Sung, J. M., Hywel-Jones, N. L., & White Jr, J. F. Phylogenetic evidence for an animal pathogen origin of ergot and the grass endophytes. *Molecular ecology*. 2007, 16, 8, 1701-1711.
124. Khonsanit, A., Luangsa-ard, J. J., Thanakitpipattana, D., Kobmoo, N., & Piasai, O. Cryptic species within *Ophiocordyceps myrmecophila* complex on formicine ants from Thailand. *Mycological progress*. 2019, 18 (1-2), 147-161.
125. Schoch, C. L., Seifert, K. A., Huhndorf, S., Robert, V., Spouge, J. L., Levesque, C. A., Chen, W. & Fungal Barcoding Consortium. (2012). Nuclear ribosomal internal transcribed spacer (ITS) region as a universal DNA barcode marker for Fungi. *Proceedings of the National Academy of Sciences*, 109(16), 6241-6246.
126. Xiao, Y. P., Wen, T. C., Hongsan, S., Sun, J. Z., & Hyde, K. D. (2017). Introducing *Ophiocordyceps thanathonensis*, a new species of entomogenous fungi on ants, and a reference specimen for *O. pseudolloydii*. *Phytotaxa*, 328(2), 115-126.

\*Other citations are listed in the manuscript.

**Table S2:** Proteases and related domains.

| Protein ID            | Domain                                                                                                        | Clan                                                                                     | Biological process                   | Molecular function                                                   | Cellular component                              | Feature                       | Gene       |
|-----------------------|---------------------------------------------------------------------------------------------------------------|------------------------------------------------------------------------------------------|--------------------------------------|----------------------------------------------------------------------|-------------------------------------------------|-------------------------------|------------|
| NODE_311_length_27694 | Subtilase family                                                                                              | n/a                                                                                      | proteolysis                          | serine-type endopeptidase activity                                   | cytoplasm                                       | n/a                           | CDD81_3328 |
| NODE_70_length_116917 |                                                                                                               |                                                                                          |                                      |                                                                      | extracellular space                             | signal peptide                | CDD81_7855 |
| NODE_112_length_83290 |                                                                                                               |                                                                                          |                                      |                                                                      | extracellular space                             | n/a                           | CDD81_3718 |
| NODE_133_length_71514 |                                                                                                               |                                                                                          |                                      |                                                                      | cytoplasm                                       | n/a                           | CDD81_648  |
| NODE_149_length_66206 | Subtilase family; Peptidase inhibitor I9                                                                      | n/a; Protease propeptides/inhibitors                                                     | proteolysis                          | serine-type endopeptidase activity                                   | extracellular space                             | signal peptide                | CDD81_2218 |
| NODE_243_length_37519 |                                                                                                               |                                                                                          |                                      |                                                                      | extracellular space                             | signal peptide                | CDD81_253  |
| NODE_67_length_121081 |                                                                                                               |                                                                                          |                                      |                                                                      | cytoplasm                                       | n/a                           | CDD82_1444 |
| NODE_94_length_88402  | Subtilase family; Peptidase inhibitor I9; Chitin recognition protein                                          | n/a; Protease propeptides/inhibitors; n/a                                                | proteolysis                          | serine-type endopeptidase activity; chitin binding                   | nucleus                                         | n/a                           | CDD81_3985 |
| NODE_70_length_116917 | Subtilase family; Proprotein convertase P-domain                                                              | n/a; Galactose-binding domain-like superfamily                                           | proteolysis                          | serine-type endopeptidase activity                                   | integral component of membrane; plasma membrane | transmembrane alpha helix     | CDD81_7829 |
| NODE_235_length_39940 | Peptidase family C54                                                                                          | Peptidase clan CA                                                                        | protein transport; autophagy         | cysteine-type peptidase activity                                     | nucleus; cytoplasm                              | n/a                           | CDD82_1507 |
| NODE_52_length_140965 | Peptidase family M28; PA domain                                                                               | Peptidase clan MH/MC/MF; LeuD/IlvD-like                                                  | n/a                                  | metal ion binding; aminopeptidase activity                           | extracellular space                             | signal peptide                | CDD81_229  |
| NODE_84_length_99438  | Dipeptidyl peptidase IV (DPP IV) N-terminal region; Prolyl oligopeptidase family                              | Beta propeller; Alpha/Beta hydrolase fold                                                | proteolysis                          | serine-type peptidase activity                                       | cytoplasm                                       | n/a                           | CDD81_6047 |
| NODE_149_length_66206 | Dipeptidyl peptidase IV (DPP IV) N-terminal region; Prolyl oligopeptidase family; Alpha/beta hydrolase family | Beta propeller; Alpha/Beta hydrolase fold                                                | proteolysis                          | serine-type peptidase activity                                       | extracellular space                             | signal peptide                | CDD81_2227 |
| NODE_42_length_162368 | ERAP1-like C-terminal domain; Peptidase family M1 domain; Peptidase M1 N-terminal domain                      | Ig-like fold superfamily (E-set); Peptidase clan MA; Baculovirus p35 protein superfamily | n/a                                  | aminopeptidase activity; metallopeptidase activity; zinc ion binding | cytoplasm                                       | n/a                           | CDD81_2826 |
| NODE_347_length_22686 |                                                                                                               |                                                                                          |                                      |                                                                      |                                                 |                               | CDD81_3652 |
| NODE_103_length_85904 | Metallopeptidase family M24                                                                                   | n/a                                                                                      | protein initiator methionine removal | metal ion binding; metalloaminopeptidase activity                    | cytoplasm; extracellular space                  | n/a                           | CDD81_6391 |
| NODE_25_length_195320 | Metallopeptidase family M24; Aminopeptidase P, N-terminal domain                                              | n/a; Creatinase/prolidase N-terminal domain superfamily                                  | n/a                                  | aminopeptidase activity; manganese ion binding                       | mitochondrion                                   | mitochondrial transit peptide | CDD81_1315 |
| NODE_128_length_73625 |                                                                                                               |                                                                                          |                                      |                                                                      | cytoplasm                                       | n/a                           | CDD81_746  |
| NODE_243_length_37519 |                                                                                                               |                                                                                          |                                      |                                                                      | mitochondrion                                   | n/a                           | CDD81_258  |

|                       |                                                                                                         |                                                         |                                      |                                                                       |                     |                |            |
|-----------------------|---------------------------------------------------------------------------------------------------------|---------------------------------------------------------|--------------------------------------|-----------------------------------------------------------------------|---------------------|----------------|------------|
| NODE_29_length_188585 | Metallopeptidase family M24; zf-MYND-like zinc finger, mRNA-binding; MYND finger                        | n/a; TRASH superfamily                                  | protein initiator methionine removal | metal ion binding; metalloaminopeptidase activity                     | cytoplasm           | n/a            | CDD81_3215 |
| NODE_448_length_10035 | Metallopeptidase family M24; Creatinase/Prolidase N-terminal domain; C-terminal region of peptidase M24 | n/a; Creatinase/prolidase N-terminal domain superfamily | n/a                                  | metal ion binding; metalloaminopeptidase activity; hydrolase activity | mitochondrion       | n/a            | CDD81_5383 |
| NODE_73_length_110288 | Aminopeptidase I zinc metalloprotease (M18)                                                             | Peptidase clan MH/MC/MF                                 | proteolysis                          | aminopeptidase activity; metallopeptidase activity; zinc ion binding  | cytoplasm           | n/a            | CDD81_1040 |
| NODE_168_length_57686 | Aminopeptidase I zinc metalloprotease (M18); M42 glutamyl aminopeptidase                                | Peptidase clan MH/MC/MF                                 | proteolysis                          | aminopeptidase activity; metallopeptidase activity; zinc ion binding  | extracellular space | n/a            | CDD81_1337 |
| NODE_147_length_67131 | LysM domain                                                                                             | LysM-like domain                                        | n/a                                  | n/a                                                                   | nucleus             | n/a            | CDD81_780  |
| NODE_135_length_70958 | Glycosyl hydrolase family 61                                                                            | Ig-like fold superfamily (E-set)                        | n/a                                  | chitin binding                                                        | extracellular space | signal peptide | CDD81_5862 |

**Table S3:** Predicted phospholipase domains for the entomopathogenic fungus *O. australis* CCMB661.

| Protein ID            | Domain                                                                                                              | Clan                                                        | Biological process                                                                                 | Molecular function                                                                                             | Cellular component  | Feature                       | Gene       |
|-----------------------|---------------------------------------------------------------------------------------------------------------------|-------------------------------------------------------------|----------------------------------------------------------------------------------------------------|----------------------------------------------------------------------------------------------------------------|---------------------|-------------------------------|------------|
| NODE_347_length_22686 | Patatin-like phospholipase;<br>Domain of unknown function                                                           | Patatin/FabD/lysophospholipase-like superfamily; n/a        | lipid metabolic process                                                                            | triglyceride lipase activity                                                                                   | organelle membrane  | transmembrane alpha helix     | CDD82_222  |
| NODE_169_length_56692 |                                                                                                                     |                                                             |                                                                                                    |                                                                                                                | endomembrane system | transmembrane alpha helix     | CDD81_1349 |
| NODE_47_length_145112 | Patatin-like phospholipase; Cyclic nucleotide-binding domain                                                        | Patatin/FabD/lysophospholipase-like superfamily; Cupin fold | lipid metabolic process                                                                            | lysophospholipase activity; phosphatidyl phospholipase B activity                                              | endomembrane system | transmembrane alpha helix     | CDD81_4216 |
| NODE_39_length_172552 | Phosphatidylinositol-specific phospholipase C, X domain;<br>Phosphatidylinositol-specific phospholipase C, Y domain | PLC-like phosphodiesterases                                 | lipid metabolic process; signal transduction; intracellular signal transduction                    | phosphatidylinositol phospholipase C activity                                                                  | nucleus             | n/a                           | CDD81_4134 |
| NODE_105_length_84742 |                                                                                                                     |                                                             |                                                                                                    |                                                                                                                | nucleus             | n/a                           | CDD81_5878 |
| NODE_527_length_5624  |                                                                                                                     |                                                             |                                                                                                    |                                                                                                                | mitochondrion       | mitochondrial transit peptide | CDD81_1859 |
| NODE_6_length_286604  |                                                                                                                     |                                                             |                                                                                                    |                                                                                                                | mitochondrion       | n/a                           | CDD81_3072 |
| NODE_383_length_17045 | Phospholipase D<br>Active site motif                                                                                | Phospholipase D superfamily                                 | inositol lipid-mediated signaling; lipid catabolic process; phosphatidic acid biosynthetic process | catalytic activity; N-acylphosphatidylethanolamine-specific phospholipase D activity; phospholipase D activity | cytoplasm           | n/a                           | CDD81_7299 |
| NODE_7_length_267218  | Phospholipase D<br>Active site motif;<br>Phospholipase D<br>Active site motif                                       |                                                             |                                                                                                    |                                                                                                                | endomembrane system | transmembrane alpha helix     | CDD81_1994 |
| NODE_149_length_66206 | Prokaryotic phospholipase A2                                                                                        | Phospholipase A2 superfamily                                | arachidonic acid secretion; phospholipid metabolic process                                         | phospholipase A2 activity                                                                                      | extracellular space | signal peptide                | CDD82_2377 |

|                       |                                                        |                                                 |                                |                                                          |                                       |                                       |            |
|-----------------------|--------------------------------------------------------|-------------------------------------------------|--------------------------------|----------------------------------------------------------|---------------------------------------|---------------------------------------|------------|
| NODE_420_length_13204 | Platelet-activating factor acetylhydrolase, isoform II | Alpha/Beta hydrolase fold                       | lipid catabolic process        | 1-alkyl-2-acetylgllycerophosphocholine esterase activity | cytoplasm                             | n/a                                   | CDD81_6623 |
| NODE_378_length_17628 | Lysophospholipase catalytic domain                     | Patatin/FabD/lysophospholipase-like superfamily | phospholipid catabolic process | phospholipase activity                                   | mitochondrion                         | mitochondrial transit peptide         | CDD81_7307 |
| NODE_105_length_84742 |                                                        |                                                 |                                |                                                          | anchored component of plasma membrane | signal peptide, lipidation GPI-anchor | CDD81_6239 |

**Table S4:** Protein tyrosine phosphatase – PTP domains.

| Protein ID                   | Domain                                                                                                                                                  | Clan                                   | Biological process                                                            | Molecular function                                                                                                                       | Cellular component  | Feature                   | Gene       | Pfam predicted active site                                                 |
|------------------------------|---------------------------------------------------------------------------------------------------------------------------------------------------------|----------------------------------------|-------------------------------------------------------------------------------|------------------------------------------------------------------------------------------------------------------------------------------|---------------------|---------------------------|------------|----------------------------------------------------------------------------|
| <b>NODE_3_length_322389</b>  | Dual specificity phosphatase, catalytic domain                                                                                                          | Phosphatase                            | dephosphorylation                                                             | protein tyrosine/serine/threonine phosphatase activity                                                                                   | cytoplasm           | n/a                       | CDD81_7917 | Similarity to A0A0V0X9Z7 (A0A0V0X9Z7_9BILA)                                |
| <b>NODE_1_length_491455</b>  |                                                                                                                                                         |                                        |                                                                               |                                                                                                                                          | mitochondrion       | n/a                       | CDD81_5603 | Similarity to A0A0V0X9Z7 (A0A0V0X9Z7_9BILA)                                |
| <b>NODE_111_length_83425</b> |                                                                                                                                                         |                                        |                                                                               |                                                                                                                                          | mitochondrion       | n/a                       | CDD81_1320 | Similarity to Q93096 (TP4A1_HUMAN)                                         |
| <b>NODE_486_length_7628</b>  | Dual specificity phosphatase, catalytic domain; Dual specificity protein phosphatase, N-terminal half; Protein-tyrosine phosphatase                     | Phosphatase                            | dephosphorylation; protein dephosphorylation; regulation of exit from mitosis | protein tyrosine/serine/threonine phosphatase activity; protein tyrosine phosphatase activity                                            | organelle membrane  | transmembrane alpha helix | CDD81_4327 | Similarity to A0A0V0X9Z7 (A0A0V0X9Z7_9BILA)                                |
| <b>NODE_88_length_94299</b>  | Dual specificity phosphatase, catalytic domain; Alpha/beta hydrolase family; Alpha/beta hydrolase fold; Serine aminopeptidase, S33; Thioesterase domain | Phosphatase; Alpha/Beta hydrolase fold | dephosphorylation; biosynthetic process                                       | protein tyrosine phosphatase activity; protein tyrosine/serine/threonine phosphatase activity; hydrolase activity, acting on ester bonds | cytoplasm           | n/a                       | CDD81_5141 | Similarity to A1CLZ0 (CCSE_ASPL); A0A0V0X9Z7 (A0A0V0X9Z7_9BILA)            |
| <b>NODE_371_length_19466</b> | Low molecular weight phosphotyrosine protein phosphatase                                                                                                | Phosphatase                            | protein dephosphorylation                                                     | acid phosphatase activity; non-membrane spanning protein tyrosine phosphatase activity                                                   | extracellular space | n/a                       | CDD81_6384 | Similarity to P11064 (PPAC_BOVIN)                                          |
| <b>NODE_2_length_336043</b>  | Myotubularin-like phosphatase domain                                                                                                                    | Phosphatase                            | dephosphorylation                                                             | protein tyrosine phosphatase activity                                                                                                    | cytoplasm           | n/a                       | CDD81_6925 | Similarity to Q9Z2C9 (MTMR7_MOUSE)                                         |
| <b>NODE_92_length_90100</b>  | Protein-tyrosine phosphatase                                                                                                                            | Phosphatase                            | protein dephosphorylation                                                     | protein tyrosine phosphatase activity                                                                                                    | endomembrane system | transmembrane alpha helix | CDD81_4528 | Similarity to A0A287D394 (A0A287D394 ICTTR)                                |
| <b>NODE_143_length_68526</b> | Rhodanese-like domain                                                                                                                                   | Phosphatase                            | positive regulation of cell cycle G2/M phase transition                       | protein tyrosine phosphatase activity                                                                                                    | nucleus             | n/a                       | CDD81_4305 | Similarity to A0A0H5C8P2 (A0A0H5C8P2_CYBJN)                                |
| <b>NODE_42_length_162368</b> | Rhodanese-like domain; Protein-tyrosine phosphatase                                                                                                     | Phosphatase                            | protein dephosphorylation                                                     | protein tyrosine phosphatase activity                                                                                                    | cytoplasm           | n/a                       | CDD81_1533 | Similarity to A0A287D394 (A0A287D394 ICTTR); A0A0Q3SZT0 (A0A0Q3SZT0_AMAAE) |



|                              |                                                          |                         |                                              |                                                                                               |                                           |                               |            |                                   |
|------------------------------|----------------------------------------------------------|-------------------------|----------------------------------------------|-----------------------------------------------------------------------------------------------|-------------------------------------------|-------------------------------|------------|-----------------------------------|
| <b>NODE_19_length_209599</b> | Tyrosine phosphatase family; Tyrosine phosphatase family | Phosphatase             | dephosphorylation                            | protein tyrosine phosphatase activity                                                         | cytoplasm; integral component of membrane | n/a                           | CDD81_3541 | Similarity to Q4P7L6 (OCA1_USTMA) |
| <b>NODE_82_length_100911</b> | Uncharacterized protein                                  | Uncharacterized protein | protein dephosphorylation; dephosphorylation | protein tyrosine phosphatase activity; protein tyrosine/serine/threonine phosphatase activity | mitochondrion                             | mitochondrial transit peptide | CDD81_2497 | n/a                               |
